# Supplementary material for: The effect of a single spinal manipulation on cardiovascular autonomic activity and the relationship to pressure pain threshold: a randomized, cross-over, sham-controlled trial
Source: PubMed Central journal article supplement (PMC6971986; doi:10.1186/s12998-019-0293-4), 2020-01-20
Supplement: 12998_2019_293_MOESM2_ESM.pdf [file 12998_2019_293_MOESM2_ESM.pdf]

## Additional file 2

| Correlation coefficients at each time point between cardiovascular autonomic outcomes and PPT in an RCT on spinal manipulation |      |                            |                    |                    |                    |                         |                    |                    |                    |
|--------------------------------------------------------------------------------------------------------------------------------|------|----------------------------|--------------------|--------------------|--------------------|-------------------------|--------------------|--------------------|--------------------|
| Outcomes                                                                                                                       |      | Log local PPT (kPa) N = 41 |                    |                    |                    | Distal PPT (kPa) N = 37 |                    |                    |                    |
|                                                                                                                                |      | Baseline                   | Post 1             | Post 2             | Post 3             | Baseline                | Post 1             | Post 2             | Post 3             |
| RRi (ms)                                                                                                                       | SM   | 0.078                      | 0.104              | 0.012              | -0.077             | 0.194                   | 0.088              | 0.065              | 0.059              |
| N=41                                                                                                                           | Sham | -0.042                     | -0.086             | -0.151             | -0.057             | 0.088                   | 0.064              | 0.009              | 0.042              |
| Log HF-HRV (ms <sup>2</sup> )                                                                                                  | SM   | -0.243                     | -0.202             | -0.271             | -0.241             | 0.054                   | -0.112             | -0.031             | 0.032              |
| N=41                                                                                                                           | Sham | -0.103                     | -0.039             | -0.153             | -0.124             | 0.076                   | 0.223              | 0.078              | 0.073              |
| HF nu                                                                                                                          | SM   | -0.151                     | -0.329             | -0.160             | -0.177             | -0.085                  | -0.201             | -0.091             | -0.049             |
| N=41                                                                                                                           | Sham | -0.161                     | 0.060              | 0.068              | -0.151             | -0.154                  | 0.139              | 0.239              | -0.108             |
| Log LF-HRV (ms <sup>2</sup> )                                                                                                  | SM   | -0.156                     | 0.041              | -0.269             | -0.161             | 0.194                   | 0.027              | 0.019              | 0.061              |
| N=41                                                                                                                           | Sham | 0.066                      | -0.066             | -0.225             | -0.003             | 0.257                   | 0.162              | -0.123             | 0.216              |
| Log LF/HF                                                                                                                      | SM   | 0.172                      | 0.307              | 0.105              | 0.164              | 0.088                   | 0.170              | 0.084              | 0.025              |
| N=41                                                                                                                           | Sham | 0.210                      | -0.029             | -0.042             | 0.157              | 0.182                   | -0.115             | -0.227             | 0.119              |
| Log RMSSD (ms)                                                                                                                 | SM   | -0.174                     | -0.168             | -0.263             | -0.215             | 0.074                   | -0.093             | -0.020             | 0.054              |
| N=41                                                                                                                           | Sham | -0.022                     | -0.067             | -0.177             | -0.076             | 0.077                   | 0.165              | -0.018             | 0.060              |
| Log SDNN (ms)                                                                                                                  | SM   | -0.176                     | -0.263             | -0.223             | -0.207             | 0.101                   | -0.162             | 0.000              | 0.100              |
| N=41                                                                                                                           | Sham | 0.067                      | -0.113             | -0.164             | -0.050             | 0.151                   | 0.128              | -0.067             | 0.064              |
| SBP (mmHg)                                                                                                                     | SM   | 0.153                      | 0.246              | 0.289              | 0.278              | -0.011                  | 0.023              | -0.042             | 0.200              |
| N=30                                                                                                                           | Sham | 0.144                      | 0.012              | 0.090              | 0.154              | 0.014                   | -0.077             | 0.092              | 0.151              |
| DBP (mmHg)                                                                                                                     | SM   | -0.008                     | 0.195              | 0.146              | 0.222              | -0.135                  | -0.037             | -0.157             | -0.060             |
| N=30                                                                                                                           | Sham | 0.024                      | -0.126             | 0.051              | 0.101              | -0.065                  | -0.195             | -0.138             | -0.083             |
| MBP (mmHg)                                                                                                                     | SM   | 0.093                      | 0.279              | 0.231              | 0.314              | -0.103                  | -0.017             | -0.115             | 0.039              |
| N=30                                                                                                                           | Sham | 0.152                      | 0.006              | 0.162              | 0.203              | -0.014                  | -0.138             | -0.038             | -0.007             |
| LF-SBF (mm <sup>2</sup> Hg)                                                                                                    | SM   | 0.225 <sup>†</sup>         | 0.164 <sup>†</sup> | 0.139 <sup>†</sup> | 0.211 <sup>†</sup> | 0.101 <sup>†</sup>      | 0.252 <sup>†</sup> | 0.191 <sup>†</sup> | 0.104 <sup>†</sup> |
| N=30                                                                                                                           | Sham | 0.472 <sup>†</sup>         | 0.398 <sup>†</sup> | 0.292 <sup>†</sup> | 0.439 <sup>†</sup> | 0.443 <sup>†</sup>      | 0.292 <sup>†</sup> | 0.263 <sup>†</sup> | 0.409 <sup>†</sup> |

### Notes:

- Statistically significant correlations at  $p < 0.006$  (Bonferroni correction) are bold faced

- † Spearman's correlation coefficients

- Pearson's correlation coefficients unless contrary mention

### Abbreviations:

SM: Spinal manipulation, RRi: intervals between normal beats; Log: logarithm with base 10; HF: high frequency; HF nu:  $HF/(HF + LF) \times 100$ ; LF: low frequency; RMSSD: root mean square of the successive differences between normal heartbeats; SDNN: standard deviation of the inter beat interval of normal sinus beats; SBP: systolic blood pressure; DBP: diastolic blood pressure; MBP: mean blood pressure; PPT: pressure pain threshold

| Baseline comparisons and test for carry-over effect in an RCT on spinal manipulation |                                               |                                                              |                                                                |
|--------------------------------------------------------------------------------------|-----------------------------------------------|--------------------------------------------------------------|----------------------------------------------------------------|
|                                                                                      | Baseline SM vs. Baseline sham                 | Baseline SM:<br>SM – sham sequence vs.<br>sham – SM sequence | Baseline sham:<br>SM – sham sequence vs.<br>sham – SM sequence |
|                                                                                      | Paired t test or Wilcoxon<br>signed rank test | Independent t test or Mann-<br>Whitney U test                | Independent t test or Mann-<br>Whitney U test                  |
| RRi (ms)<br>N = 41                                                                   | t(40) = -0.009 p = 0.992                      | t(39) = -1.363 p = 0.181<br>U = 166 p = 0.261                | t(39) = -1.113 p = 0.911<br>U = 207 p = 0.958                  |
| Log HF-HRV (ms <sup>2</sup> )<br>N = 41                                              | t(40) = -0.195 p = 0.846                      | t(39) = 0.118 p = 0.906<br>U = 202 p = 0.855                 | t(39) = 0.064 p = 0.950<br>U = 203 p = 0.875                   |
| HF normalized unit<br>N = 41                                                         | t(40) = -0.390 p = 0.699                      | t(39) = -0.19 p = 0.985<br>U = 194 p = 0.695                 | t(39) = -0.231 p = 0.817<br>U = 194 p = 0.695                  |
| Log LF-HRV (ms <sup>2</sup> )<br>N = 41                                              | t(40) = 0.139 p = 0.890                       | t(39) = 0.210 p = 0.835<br>U = 196 p = 0.734                 | t(39) = 0.443 p = 0.660<br>U = 192 p = 0.657                   |
| Log LF/HF<br>N = 41                                                                  | t(40) = 0.311 p = 0.757                       | t(39) = 0.037 p = 0.971<br>U = 198 p = 0.774                 | t(39) = 0.414 p = 0.681<br>U = 194 p = 0.695                   |
| Log RMSSD (ms)<br>N = 41                                                             | t(40) = -0.122 p = 0.903                      | t(39) = -0.334 p = 0.740<br>U = 191 p = 0.638                | t(39) = 0.135 p = 0.893<br>U = 204 p = 0.896                   |
| Log SDNN (ms)<br>N = 41                                                              | t(40) = 0.100 p = 0.921                       | t(39) = 0.001 p = 0.999<br>U = 195 p = 0.714                 | t(39) = -0.480 p = 0.634<br>U = 185 p = 0.530                  |
| SBP (mmHg)<br>N = 30                                                                 | t(29) = -0.275 p = 0.785                      | t(28) = 2.596 p = 0.015<br>U = 57 p = 0.022                  | t(39) = -0.736 p = 0.468<br>U = 98 p = 0.580                   |
| DBP (mmHg)<br>N = 30                                                                 | t(29) = -0.359 p = 0.722                      | t(28) = 2.021 p = 0.053<br>U = 75 p = 0.131                  | t(39) = -0.540 p = 0.594<br>U = 97 p = 0.552                   |
| MBP (mmHg)<br>N = 30                                                                 | t(29) = -0.477 p = 0.637                      | t(28) = 2.435 p = 0.022<br>U = 61 p = 0.034                  | t(39) = -0.524 p = 0.604<br>U = 100 p = 0.637                  |
| LF-SBP (mm <sup>2</sup> Hg)<br>N = 30                                                | Z = -0.792 p = 0.428                          | U = 103 p = 0.728                                            | U = 97 p = 0.552                                               |

*Abbreviations:*  
*SM: spinal manipulation (HVLA technique); RRi: intervals between normal beats; Log: logarithm with base 10; HF: high frequency; HF normalized unit: HF/(HF + LF) x 100; LF: low frequency; RMSSD: root mean square of the successive differences between normal heartbeats; SDNN: standard deviation of the inter beat interval of normal sinus beats; SBP: systolic blood pressure; DBP: diastolic blood pressure; MBP: mean blood pressure;*

| Data for further meta-analysis |                 |          |        |        |        |
|--------------------------------|-----------------|----------|--------|--------|--------|
| Outcomes                       |                 | Baseline | Post 1 | Post 2 | Post 3 |
| HR (bpm)                       | Mean difference | 0.372    | -0.262 | -0.130 | -0.664 |
| N=41                           | SEM             | 1.111    | 0.840  | 0.784  | 0.706  |
| RRi (ms)                       | Mean difference | -0.132   | 7.585  | 4.388  | 11.919 |
| N=41                           | SEM             | 13.886   | 11.651 | 11.313 | 10.036 |
| Log HF-HRV (ms <sup>2</sup> )  | Mean difference | -0.010   | 0.010  | 0.098  | 0.053  |
| N=41                           | SEM             | 0.053    | 0.056  | 0.054  | 0.050  |
| HF nu                          | Mean difference | -0.966   | 0.525  | -0.425 | 1.801  |
| N=41                           | SEM             | 2.479    | 2.756  | 2.487  | 2.666  |
| Log LF-HRV (ms <sup>2</sup> )  | Mean difference | 0.007    | -0.020 | 0.109  | 0.022  |
| N=41                           | SEM             | 0.053    | 0.072  | 0.055  | 0.066  |
| Log LF/HF                      | Mean difference | 0.018    | -0.030 | 0.011  | -0.031 |
| N=41                           | SEM             | 0.057    | 0.061  | 0.052  | 0.055  |
| Log RMSSD (ms)                 | Mean difference | -0.004   | 0.015  | 0.046  | 0.027  |
| N=41                           | SEM             | 0.030    | 0.026  | 0.025  | 0.027  |
| Log SDNN (ms)                  | Mean difference | 0.002    | 0.010  | 0.043  | 0.025  |
| N=41                           | SEM             | 0.022    | 0.021  | 0.019  | 0.024  |
| LF-SBF (mm <sup>2</sup> Hg)    | Mean difference | 0.270    | 1.172  | 0.008  | 0.599  |
| N=30                           | SEM             | 0.667    | 1.103  | 0.751  | 0.793  |

*Abbreviations:*

*Mean difference: Spinal manipulation – Sham; SEM: Standard error of the mean difference; HR: heart rate in beats per minute; RRi: intervals between normal beats; Log: logarithm with base 10; HF: high frequency; HF nu:  $HF/(HF + LF) \times 100$ ; LF: low frequency; RMSSD: root mean square of the successive differences between normal heartbeats; SDNN: standard deviation of the inter beat interval of normal sinus beats; SBP: systolic blood pressure;*
